# Supplementary material
Source: publisher site journal article supplement (https://www.spandidos-publications.com/8400/downloadSupplementary)
Supplement: Supplementary file 1 [file downloadSupplementary]

**Table SI.** Preoperative laboratory test indicators for the patient.

| <b>A, Blood routine</b>            |              |                     |
|------------------------------------|--------------|---------------------|
| <b>Parameter</b>                   | <b>Value</b> | <b>Normal range</b> |
| WBC, x10 <sup>9</sup> /l           | 7.89         | 4-10                |
| NE#, x10 <sup>9</sup> /l           | 5.17         | 2-7.7               |
| NE%                                | 65.50        | 40.0-75.0           |
| MO%                                | 8.30         | 3-10                |
| MO#, x10 <sup>9</sup> /l           | 0.65         | 0.12-0.8            |
| LY%                                | 24.80        | 20.0-50.0           |
| <b>B, Liver and renal function</b> |              |                     |
| <b>Parameter</b>                   | <b>Value</b> | <b>Normal range</b> |
| ALB, g/l                           | 41.8         | 40-55               |
| ALT, U/l                           | 45           | 9-50                |
| CREA, μmol/l                       | 69           | 44-132.6            |
| <b>C, Urine analysis</b>           |              |                     |
| <b>Parameter</b>                   | <b>Value</b> | <b>Normal range</b> |
| PH                                 | 7.2          | 5.0-7.5             |
| D, Coagulation                     |              |                     |
| Parameter                          | Value        | Normal range        |
| PT, s                              | 10.4         | 10-15               |
| TT, s                              | 14.6         | 14-21               |
| APTT, s                            | 24.2         | 23-37               |

WBC, white blood cell; NE, neutrophil; MO, monocyte; LY, lymphocyte; ALB, albumin; ALT, alanine aminotransferase; CREA, creatinine; PH, potential of hydrogen; PT, prothrombin time; TT, thrombin time; APTT, activated partial thromboplastin time.
